# Supplementary material
Source: MDPI journal article supplement (https://www.mdpi.com/2073-4441/14/18/2831)
Supplement: s1 [file s1]

## Supplementary Materials

# Efficient Removal of Methyl Red Dye by Using Bark of Hopbush

Salma Gul <sup>1</sup>, Mansha Kanwal <sup>1</sup>, Raina Aman Qazi <sup>2</sup>, Hajera Gul <sup>2</sup>, Rozina Khattak <sup>2,\*</sup>, Muhammad Sufaid Khan <sup>3</sup>, Fatima Khitab <sup>2</sup> and Andrey E. Krauklis <sup>4</sup>

<sup>1</sup> Department of Chemistry, Women University Swabi, Swabi 22101, Pakistan

<sup>2</sup> Department of Chemistry, Shaheed Benazir Bhutto Women University; Peshawar 25000, Pakistan

<sup>3</sup> Department of Chemistry, University of Malakand, Chakdara 18800, Pakistan

<sup>4</sup> Institute for Mechanics of Materials, University of Latvia, Jelgavas Street 3, LV-1004 Riga, Latvia

\* Correspondence: rznkhattak@sbbwu.edu.pk or rznkhattak@yahoo.com

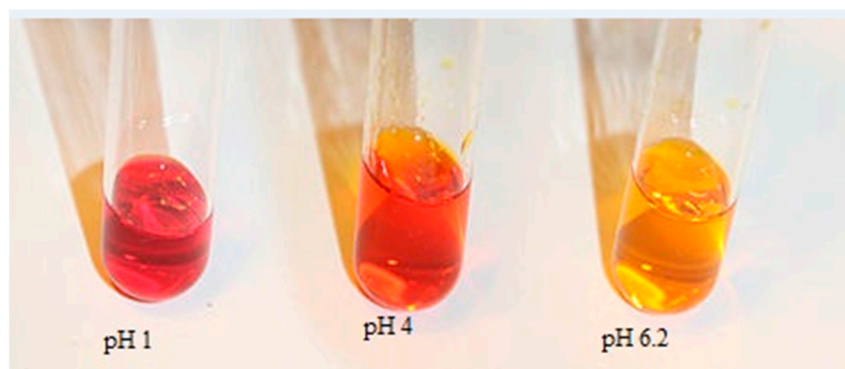

**Figure S1.** Colour of methyl red at different pH.

**Citation:** Gul, S.; Kanwal, M.; Qazi, R.A.; Gul, H.; Khattak, R.; Khan, M.S.; Khitab, F.; Krauklis, A.E. Efficient Removal of Methyl Red Dye by Using Bark of Hopbush. *Water* **2022**, *14*, 2831. <https://doi.org/10.3390/w14182831>

Academic Editor: Antonio Zuorro

Received: 8 August 2022

Accepted: 5 September 2022

Published: 11 September 2022

**Publisher's Note:** MDPI stays neutral with regard to jurisdictional claims in published maps and institutional affiliations.

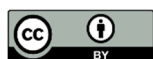

**Copyright:** © 2022 by the authors. Licensee MDPI, Basel, Switzerland. This article is an open access article distributed under the terms and conditions of the Creative Commons Attribution (CC BY) license (<https://creativecommons.org/licenses/by/4.0/>).

**E1:** Methyl Red gives different colour (Fig S1, E1) at different pH [41]. The following is the structure of methyl red which is unprotonated form of methyl red and is yellow in color due to extended conjugation. When dimethyl amino group is protonated the quinone diimine is formed, which is a dark colored chromophore [27, 40]. Figure S2 shows the protonation of methyl red dye. However, Figure S3 is the representative figure of determination of wavelength maximum of methyl red.

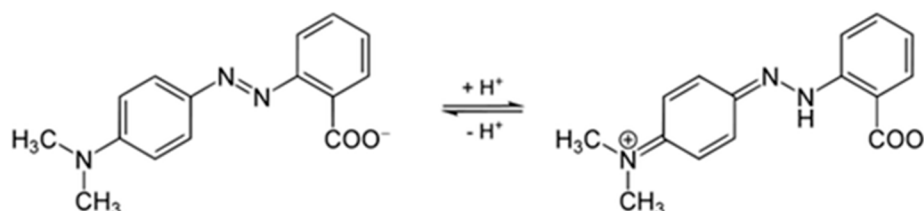

**Figure S2.** Protonation of methyl red in acidic solutions.

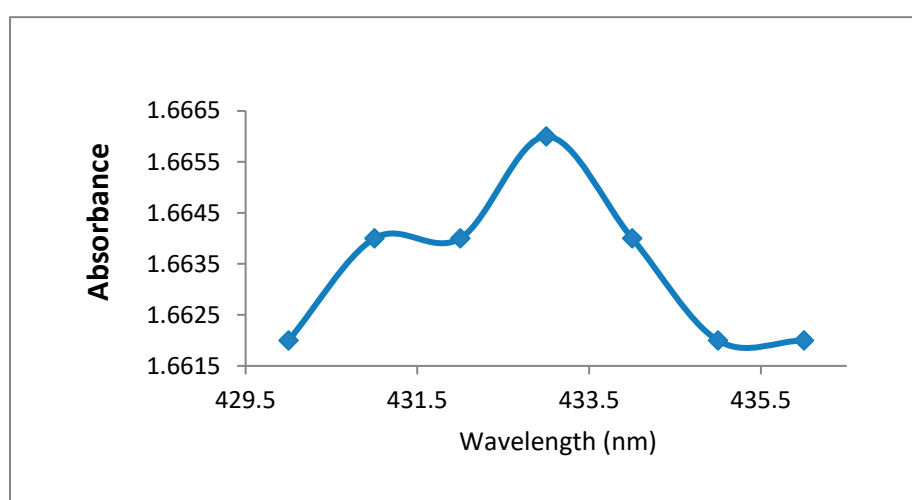

**Figure S3.** Plot of absorbance as a function of wavelength to determine wavelength maximum ( $\lambda_{\max}$ ).
